# Supplementary material
Source: Frontiers journal article supplement (https://www.frontiersin.org/articles/514303)
Supplement: Data_Sheet_1.PDF [file Data_Sheet_1.PDF]

## *Supplementary Material*

### **1 Supplementary Figures and Tables**

The supplementary Material for this article can be found online.

**Supplementary Figure S1:** Flow cytometry binding assay of anti-Tn mAb and PNA to PaTu-S and PaTu-T cells (Relates to **Figure 3C** and **3E**).

**Supplementary Figure S2:** Structural analysis of monosialylated *O*-glycan isomers of  $m/z$  675.30  $[M-H]^-$  derived from PaTu-S and PaTu-T cells on PGC nano-LC-ESI-MS/MS in negative ion mode (Relates to **Figure 4**).

**Supplementary Figure S3:** Structural analysis of monosialylated GSL-glycan isomers of  $m/z$  999.30  $[M-H]^-$  derived from PaTu-S and PaTu-T cells on PGC nano-LC-ESI-MS/MS in negative ion mode (Relates to **Figure 5**).

**Supplementary Figure S4:** Relative quantification of individual *O*-glycans derived from PaTu-S and PaTu-T cell lines on PGC nano-LC-ESI-MS/MS (Relates to **Figure 4**).

**Supplementary Figure S5:** Relative quantification of individual GSL-glycans derived from PaTu-S and PaTu-T cell lines on PGC nano-LC-ESI-MS/MS (Relates to **Figure 5**).

**Supplementary Figure S6:** Representative overlay histograms of plant lectin binding to PaTu-S and PaTu-T cells from at least three independent experiments (Relates to **Figure 6A**).

**Supplementary Figure S7:** Relative abundance of glycan structural classes in *O*-glycans and GSL-glycans derived from PaTu-S and PaTu-T cells on PGC nano-LC-ESI-MS/MS in negative ion mode.

**Supplementary Table 1:** Summary of glycosylation changes observed in pancreatic cancer epithelial-like PaTu-S and mesenchymal-like PaTu-T cell lines.

## 1.1 Supplementary Figures

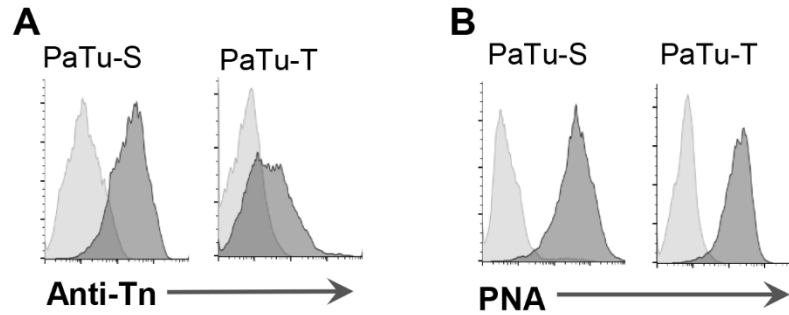

**Supplementary Figure S1. Flow cytometry binding assay of anti-Tn mAb and PNA to PaTu-S and PaTu-T cells.** Representative overlay histograms of the binding of (A) anti-Tn mAb and (B) PNA to PaTu-S and PaTu-T cells from at least three independent experiments are depicted. Dark grey field: staining with the antibody or lectin against the respective structure by means of fluorescent intensity; light grey field: background staining with secondary antibodies.

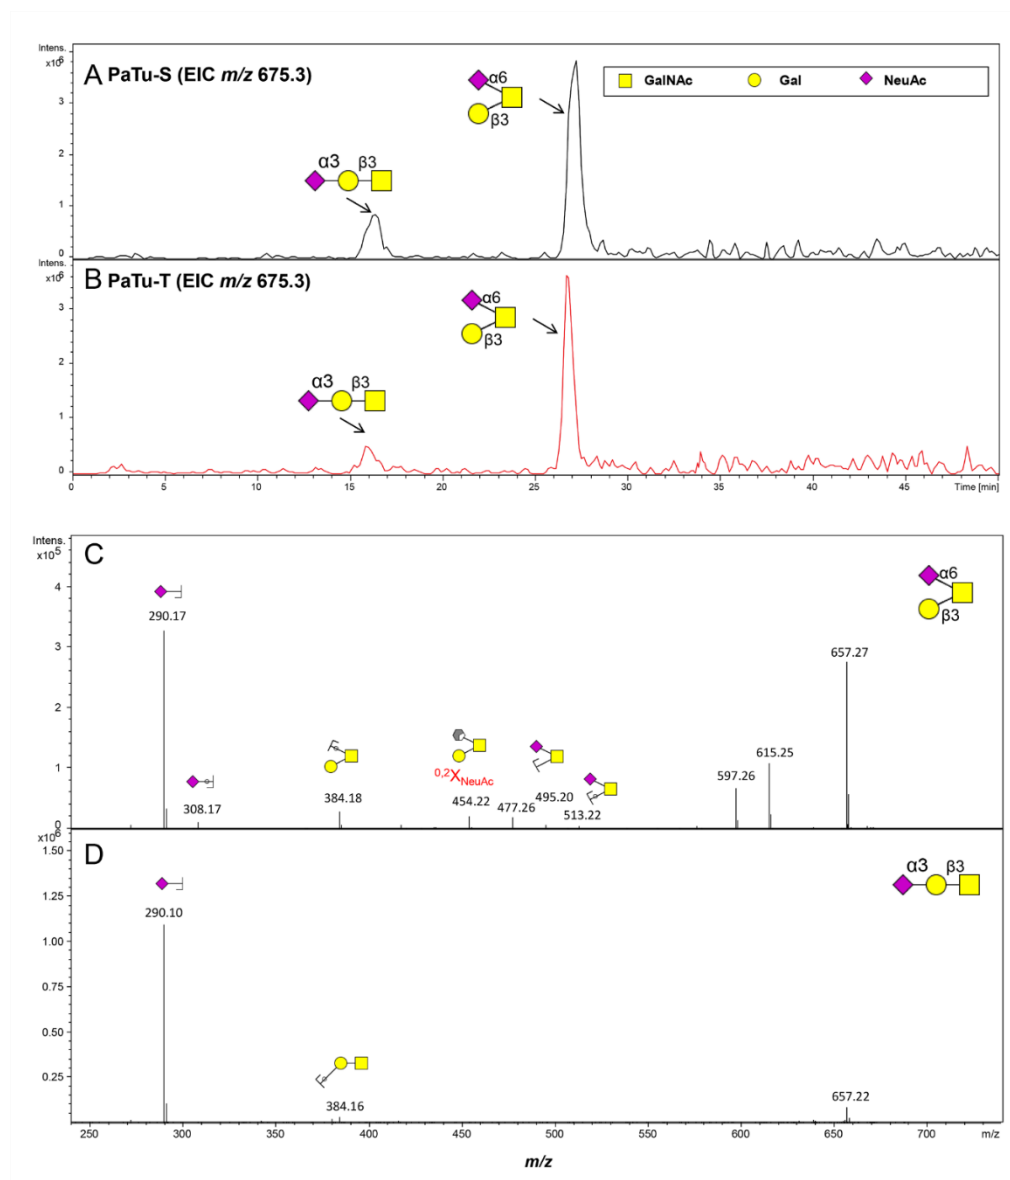

**Supplementary Figure S2.** Structural analysis of monosialylated *O*-glycan isomers of  $m/z$  675.30  $[M-H]^-$ . Chromatographic separation of monosialylated *O*-glycan isomers of  $m/z$  675.30  $[M-H]^-$  in PaTu-S (A) and PaTu-T (B) cell lines. The extracted ion chromatograms show a different retention behaviour of monosialylated *O*-glycan isomers of  $m/z$  675.30  $[M-H]^-$ . MS/MS fragmentation spectrum of the two isomers from PaTu-S cell lines confirm the structures of  $\alpha$ 2-6 sialylated core GalNAc (C, RT= 16.1 min) and  $\alpha$ 2-3 sialylated T antigen (D, RT= 26.9 min). The specific fragment ion  $m/z$  454.22 results from a  $^{0,2}X_{\text{NeuAc}}$  cross-ring fragmentation of  $\alpha$ 2-6 sialic acid. The fragment Z ion  $m/z$  495.20 and fragment Y ion  $m/z$  513.22 in the  $\alpha$ 2-6 sialylated core GalNAc isomer indicate the sialic acid is linked on the core GalNAc, compared to the absence of these ions in the sialylated T antigen.

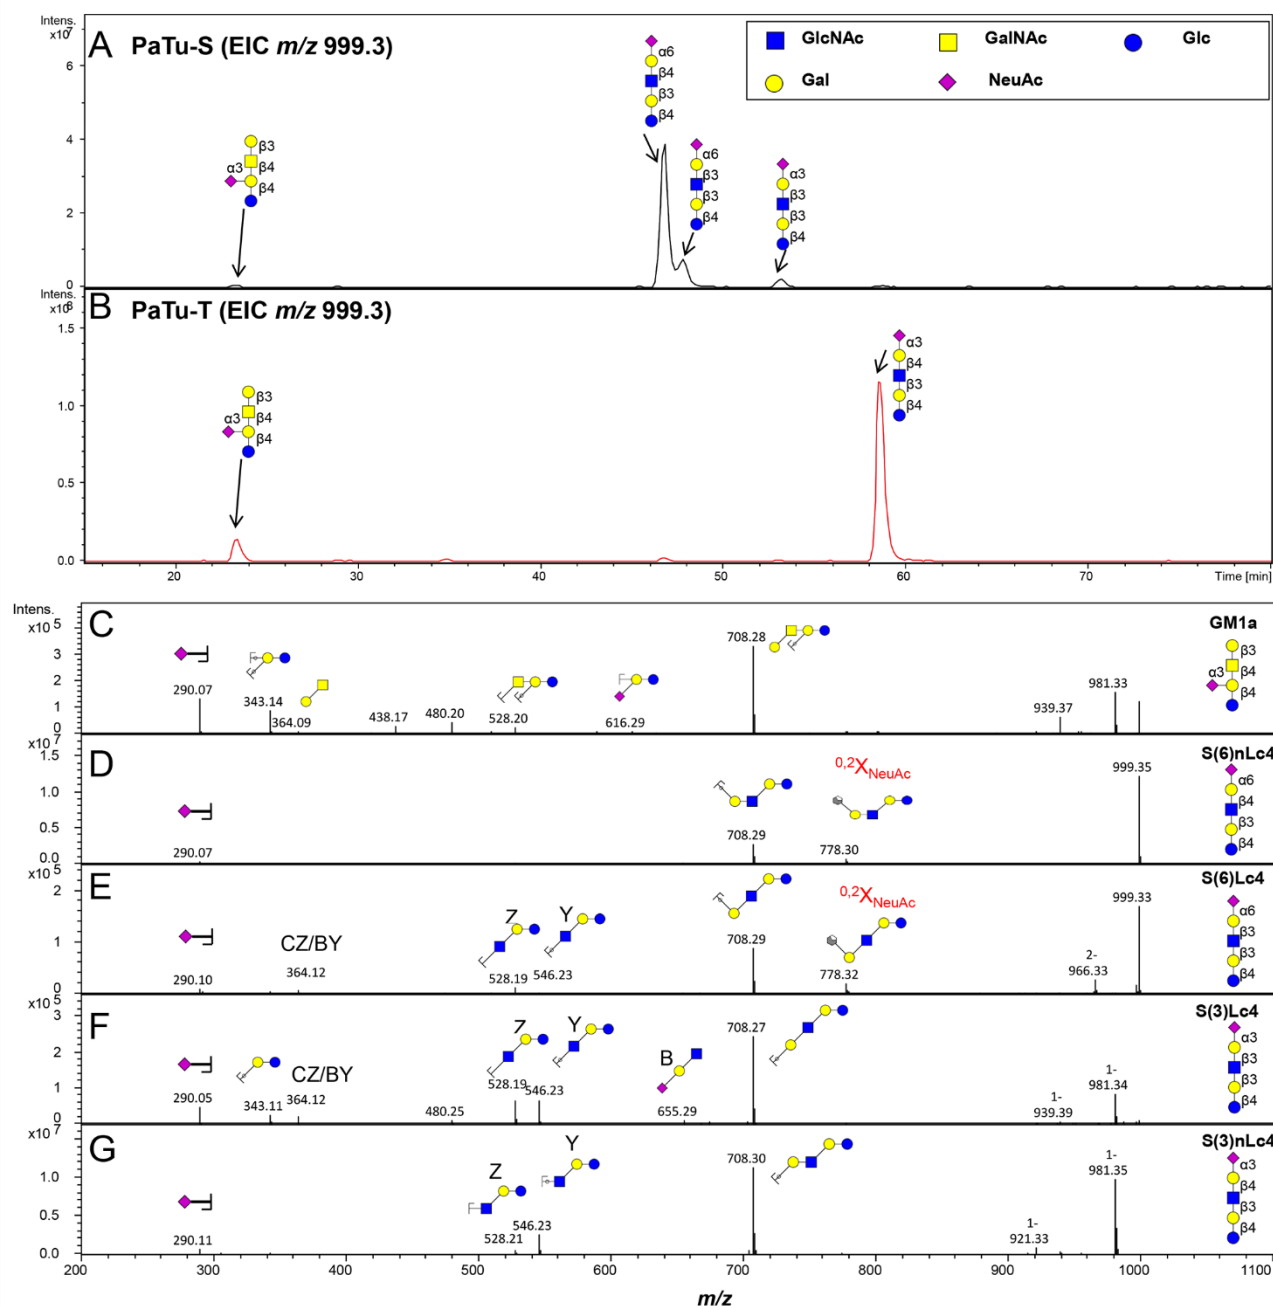

**Supplementary Figure S3.** Structural analysis of monosialylated GSL-glycan isomers of  $m/z$  999.30  $[M-H]^-$  with the same composition. Chromatographic separation of monosialylated GSL-glycan isomers of  $m/z$  999.30  $[M-H]^-$  in PaTu-S (A) and PaTu-T (B) cell lines. The extracted ion chromatograms show a different retention behaviour of five different isomers of  $m/z$  999.30  $[M-H]^-$ . MS/MS fragmentation spectrum of the four isomers from PaTu-S cell lines confirm the structures of GM1a (C, RT= 23.6min), S(6)nLc4 (D, RT= 46.4min), S(6)Lc4 (E, RT= 47.9min) and S(3)Lc4 (F, RT= 53.1 min), while the second isomer was assigned as S(3)nLc4 (G, RT= 58.9min) based on MS/MS fragmentation spectrum in PaTu-T cell line. The specific fragment ion  $m/z$  616.30 in GM1a indicate a sialylated lactose, which is not present in the terminal sialylated neolacto-series GSL-glycans. The specific fragment ion  $m/z$  778.30 result from a  $^{0,2}X_{\text{NeuAc}}$  cross-ring fragmentation of  $\alpha$ 2-6 sialic acid, indicating the  $\alpha$ 2-6 sialic acid linked to terminal galactose.

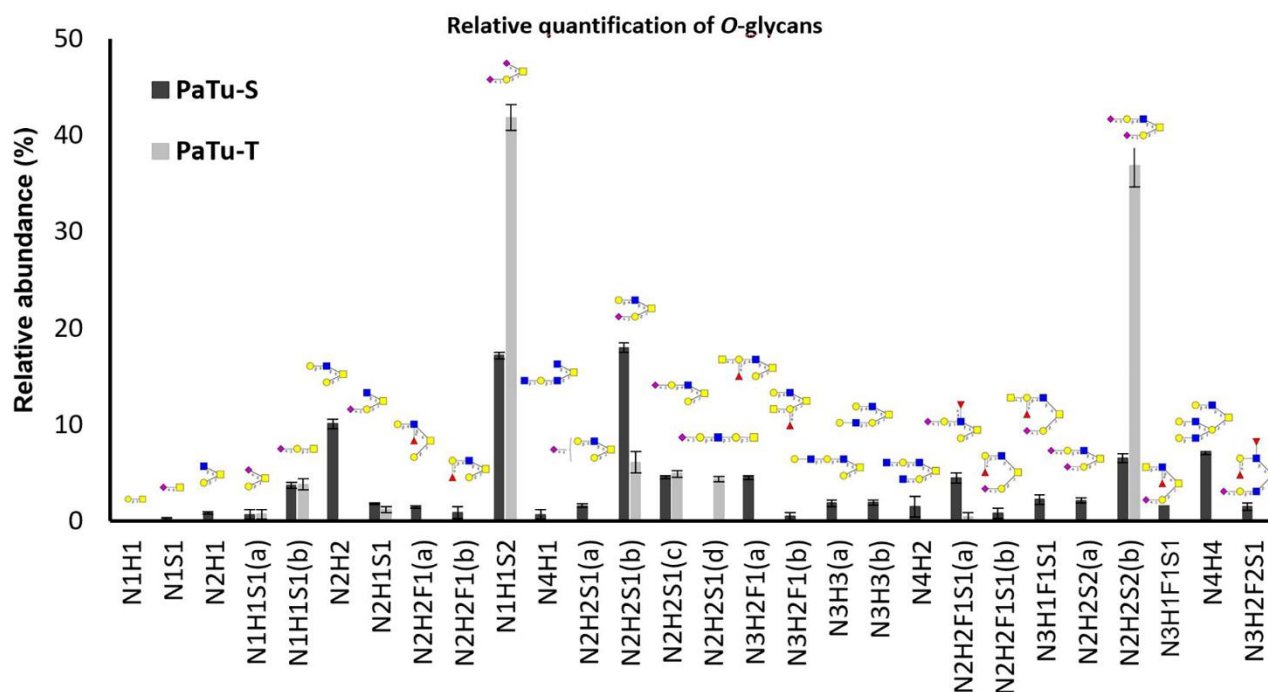

**Supplementary Figure S4.** Relative quantification of individual *O*-glycans derived from 0.5 million PaTu-S and PaTu-T cells on PGC nano-LC-ESI-MS/MS in negative ion mode (displayed as mean relative abundance plus standard deviation; N=3). Structures are depicted according to the CFG (Consortium of Functional Glycomics). Blue square: *N*-acetylglucosamine, yellow circle: galactose, red triangle: fucose, pink diamond: *N*-acetylneuraminic acid. Composition: H: hexose; N: *N*-acetylhexosamines; S: *N*-acetylneuraminic acid; a, b, c, d: isomer number.

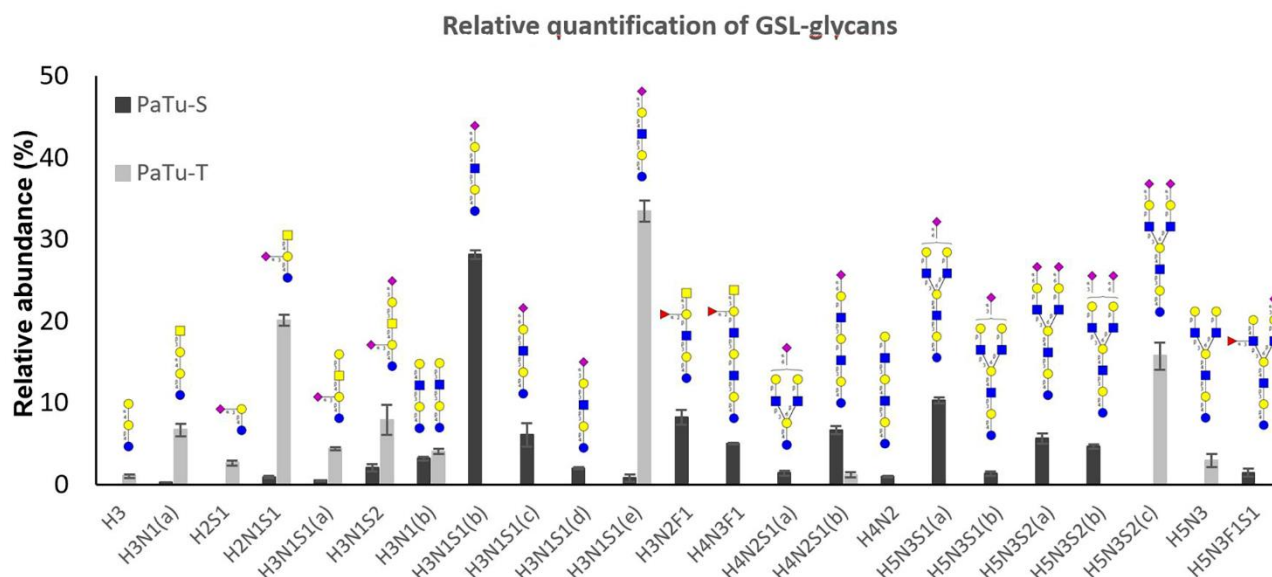

**Supplementary Figure S5.** Relative quantification of individual GSL-glycans derived from 2 million PaTu-S and PaTu-T cells on PGC nano-LC-ESI-MS/MS in negative ion mode (displayed as mean relative abundance plus standard deviation; N=3). Structures are depicted according to the CFG (Consortium of Functional Glycomics). Blue square: *N*-acetylglucosamine, yellow circle: galactose, red triangle: fucose, pink diamond: *N*-acetylneuraminic acid. Composition: H: hexose; N: *N*-acetylhexosamines; S: *N*-acetylneuraminic acid; a, b, c, d: isomer number.

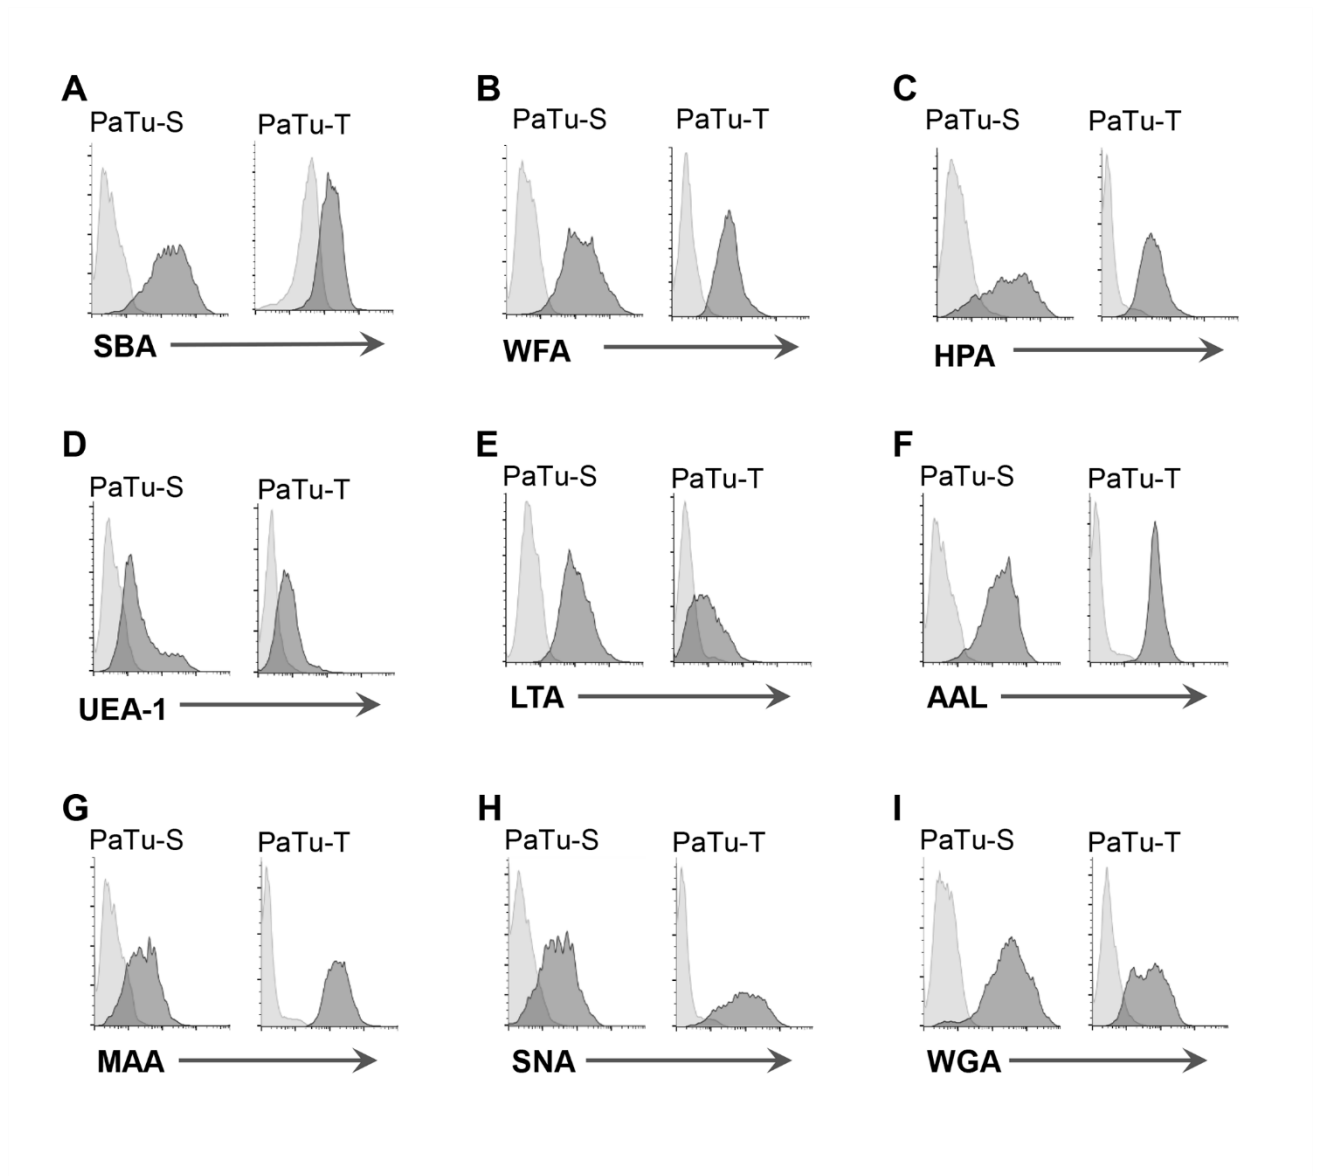

**Supplementary Figure S6. Flow cytometry binding assay with plant lectins.** Representative overlay histograms of the binding of lectins (A) SBA, (B) WFA, (C) HPA, (D) UEA-1, (E) LTA, (F) AAL, (G) MAA, (H) SNA and (I) WGA to PaTu-S and PaTu-T cells from at least three independent experiments are depicted. Dark grey field: staining with the lectin against the respective structure by means of fluorescent intensity; light grey field: background staining with secondary antibodies.

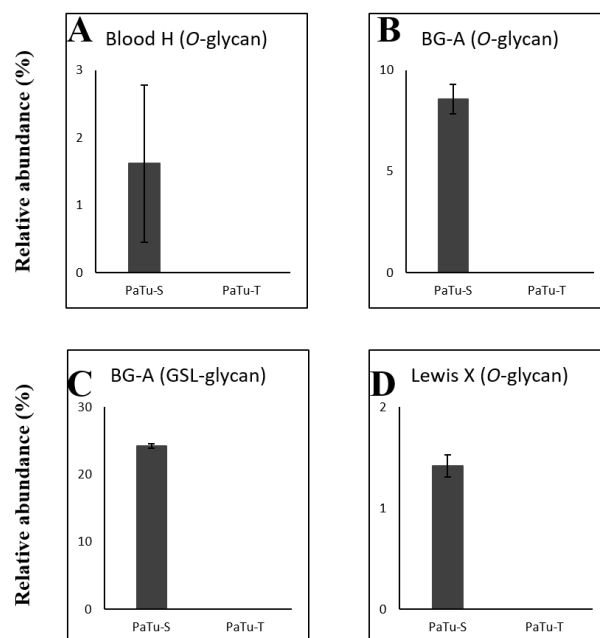

**Supplementary Figure S7.** Relative abundance of glycan structural classes in *O*-glycans and GSL-glycans derived from PaTu-S and PaTu-T cells on PGC nano-LC-ESI-MS/MS in negative ion mode (displayed as mean relative abundance plus standard deviation; N=3). **(A)** Blood group H antigen in *O*-glycans, **(B)** Blood group A (BG-A) in *O*-glycans, **(C)** BG-A in GSL-glycans, and **(D)** Lewis X in *O*-glycans.



**Supplementary Table S1:** Summary of glycosylation changes between pancreatic cancer epithelial-like PaTu-S and mesenchymal-like PaTu-T cell lines.

| Glycan types | Mesenchymal-like PaTu-T (T) compared to Epithelial-like PaTu-S (S) |            |                                                                                                                                                                                                                                                                                                                                                    |
|--------------|--------------------------------------------------------------------|------------|----------------------------------------------------------------------------------------------------------------------------------------------------------------------------------------------------------------------------------------------------------------------------------------------------------------------------------------------------|
|              |                                                                    | Expression | Observation                                                                                                                                                                                                                                                                                                                                        |
| N-glycans    | Oligomannose                                                       | T > S      | MS: increased abundance of oligomannose<br>Binding assay: higher binding to GNA and ConA                                                                                                                                                                                                                                                           |
|              | Complex                                                            | T < S      | RNA array: increased <i>MAN2A1</i> and decreased <i>MAN2A2</i><br>MS: decreased abundance of complex structure                                                                                                                                                                                                                                     |
|              | Hybrid                                                             | T < S      | MS: decreased abundance of hybrid                                                                                                                                                                                                                                                                                                                  |
|              | Branching                                                          | T < S      | RNA array: decreased <i>MGAT4A</i><br>MS: decreased abundance of tetra-antennary                                                                                                                                                                                                                                                                   |
| O-glycans    | Tn antigen                                                         | S          | RNA array: lower expression of total <i>ppGANLTTs</i> (Decreased <i>GALNT3*</i> , 4, 5*, 6, 7, and 12*; increased <i>GALNT14</i> and 18; minor change in <i>GALNT1</i> and 2)<br>qPCR: Decreased <i>GALNT3*</i> , 5*, and 12*; minor change in <i>GALNT2</i> , 7, and 14)<br>Binding assay: lower binding to MGL                                   |
|              | T antigen                                                          | T < S      | RNA array: decreased <i>C1GALT1</i><br>qPCR: decreased <i>C1GALT1</i><br>Enzyme assay with increased T antigen<br>MS: absent of T antigen                                                                                                                                                                                                          |
|              | Sialylated Tn                                                      | T < S      | Binding assay: lower binding to PNA<br>RNA array: decreased <i>ST6GANAC1</i><br>MS: absent of Sialyl-T antigen                                                                                                                                                                                                                                     |
|              | Normalized total O-glycans                                         | T < S      | RNA array: lower expression of total <i>ppGANLTTs</i> (Decreased <i>GALNT3*</i> , 4, 5*, 6, 7, and 12*; increased <i>GALNT14</i> and 18; minor change in <i>GALNT1</i> and 2)<br>qPCR: Decreased <i>GALNT3*</i> , 5*, and 12*; minor change in <i>GALNT2</i> , 7, and 14)<br>Enzyme assay: decreased Tn antigen;<br>MS: normalized total O-glycans |
|              | Core 1                                                             | T < S      | RNA array: lower expression of <i>C1GALT1</i><br>qPCR: lower expression of <i>C1GALT1</i><br>Enzyme assay with decreased T antigen<br>MS: increased abundance of total core 1 and depletion of T antigen                                                                                                                                           |
|              | Core 2/4                                                           | T < S      | RNA array: decreased expression of <i>GCNT1</i> and 3<br>Lower protein level of GCNT1 and GCNT3<br>MS: decreased abundance of core 2/4                                                                                                                                                                                                             |
|              | Core 3                                                             | T ≈ S      | RNA array: no change in <i>B3GNT6</i><br>MS: N.D.                                                                                                                                                                                                                                                                                                  |
|              | Core 1 α2-6 sialylation                                            | T > S      | RNA array: higher expression of <i>ST6GALNAC4</i> and 6<br>qPCR: higher expression of <i>ST6GALNAC4</i> and 6<br>MS: increased abundance of core GalNAc α2-6 sialylation<br>Binding assay: higher binding to SNA                                                                                                                                   |
|              | Normalized total glucosylceramide                                  | T < S      | RNA array: higher expression of <i>UGCG</i> , <i>B4GALT5</i> , 6, <i>ST3GAL5</i> , <i>A4GALT</i> , and <i>B4GALNT1</i> , lower expression of <i>UGCGL2</i> and <i>B3GNT5</i><br>qPCR: higher expression of <i>UGCG</i> , <i>ST3GAL5</i> , and <i>A4GALT</i> , lower expression of <i>B3GNT5</i>                                                    |

|             |                             |               |                                                                                                                                                                                                                                                                                                                                                                                                                                         |
|-------------|-----------------------------|---------------|-----------------------------------------------------------------------------------------------------------------------------------------------------------------------------------------------------------------------------------------------------------------------------------------------------------------------------------------------------------------------------------------------------------------------------------------|
|             |                             |               | MS: decreased normalized total abundance of GSL-glycans<br>RNA array: higher expression of <i>B4GALNT1</i> and <i>ST3GAL5</i><br>qPCR: higher expression of <i>B4GALNT1</i> and specific expression of <i>ST3GAL5</i>                                                                                                                                                                                                                   |
|             | Ganglioside                 | T > S         |                                                                                                                                                                                                                                                                                                                                                                                                                                         |
|             | Globoside                   | T             | MS: increased abundance of ganglioside<br>RNA array: specific expression of <i>A4GALT</i><br>qPCR: specific expression of <i>A4GALT</i>                                                                                                                                                                                                                                                                                                 |
|             | nsGSLs                      | T < S         | MS: specific expression of globoside (Gb3 and Gb4)<br>RNA array: lower expression of <i>B3GNT5</i><br>qPCR: lower expression of <i>B3GNT5</i><br>MS: decreased abundance of nsGSLs                                                                                                                                                                                                                                                      |
|             | Galactosylceramide          | T < S         | RNA array: decreased expression of <i>GAL3ST1</i>                                                                                                                                                                                                                                                                                                                                                                                       |
| Termination | $\alpha$ 2-3 sialylation    | T > S         | RNA array: higher expression of <i>ST3GAL1</i> , 3, 4, and 6<br>qPCR: higher expression of <i>ST3GAL3</i> , 4, and 6; minor change in <i>ST3GAL1</i><br>MS: increased abundance in <i>N</i> -glycans, <i>O</i> -glycans and GSL-glycans                                                                                                                                                                                                 |
|             | $\alpha$ 2-6 sialylation    | T > S         | Binding assay: higher binding to MAA<br>RNA array: higher expression of <i>ST6GALNAC4</i> and 6; and decreased expression of <i>ST6GAL1</i><br>qPCR: higher expression of <i>ST6GALNAC4</i> and 6; and decreased expression of <i>ST6GAL1</i><br>MS: increased abundance of core $\alpha$ 2-6 sialylation on GalNAc in <i>O</i> -glycans but decreased $\alpha$ 2-6 sialylation on Gal in <i>N</i> -, <i>O</i> -glycans and GSL-glycans |
|             | $\alpha$ 1-2 fucosylation   | T < S         | Binding assay: higher binding to SNA<br>RNA array: lower expression of <i>FUT1</i> and 2<br>qPCR: lower expression of <i>FUT1</i> and 2<br>MS: decreased total abundance of fucosylation in <i>N</i> -glycans, depletion of $\alpha$ 1-2 fucosylation in <i>O</i> -glycans and GSL-glycans                                                                                                                                              |
|             | $\alpha$ 1-3/4 fucosylation | T < S         | Binding assay: lower binding to UEA-1 and DC-SIGN<br>RNA array: lower expression of <i>FUT4</i> and higher expression of <i>FUT11</i><br>qPCR: higher expression of <i>FUT11</i><br>MS: decreased abundance of total fucosylation in <i>N</i> -glycans, decreased abundance of $\alpha$ 1-3/4 fucosylation in <i>O</i> -glycans, and depletion of $\alpha$ 1-3/4 fucosylation in GSL-glycans                                            |
|             | Terminal GalNAc             | T < S         | Binding assay: LTA and AAL<br>MS: decreased abundance of terminal HexNAc in <i>N</i> -glycans, depletion of terminal GalNAc in <i>O</i> -glycans, and minor change in GSL-glycans                                                                                                                                                                                                                                                       |
|             | Terminal GlcNAc             | T < S         | Binding assay: lower binding to SBA, WFA, HPA, and MGL<br>MS: decreased abundance of terminal HexNAc in <i>N</i> -glycans, depletion of terminal GlcNAc in <i>O</i> -glycans<br>Binding assay: lower binding to WGA                                                                                                                                                                                                                     |
|             | Lewis A                     | T $\approx$ S | Binding assay: antibody                                                                                                                                                                                                                                                                                                                                                                                                                 |

|                 |                    |       |                                                                               |
|-----------------|--------------------|-------|-------------------------------------------------------------------------------|
| Glycan epitopes | Sialylated Lewis A | T < S | MS: decreased abundance in <i>O</i> -glycans<br>Binding assay: antibody       |
|                 | Lewis B            | T > S | Binding assay: antibody                                                       |
|                 | Lewis X            | T < S | MS: depletion in <i>O</i> -glycans and GSL-glycans<br>Binding assay: antibody |
|                 | Sialylated Lewis X | T > S | Binding assay: antibody                                                       |
|                 | Lewis Y            | T < S | Binding assay: antibody                                                       |
|                 | Blood group H      | T < S | MS: Lower abundance in <i>O</i> -glycans<br>Binding assay: UEA-1              |
|                 | Blood group A      | T < S | MS: depletion in <i>O</i> -glycans and GSL-glycans<br>Binding assay: antibody |
|                 | Blood group B      | T < S | Binding assay: antibody                                                       |
|                 | Fucosylated        | T < S | Binding assay: antibody                                                       |
|                 | LacdiNAc           |       |                                                                               |

---

Note: >: Higher; ≈: Approximately equal; <: Lower; >>: significant higher; <<: significant higher; \*: depleted expression; N.D.: not detected.
